# Supplementary material for: Morphological Traits Evaluated with Random Forest Method Explains Natural Classification of Grapevine (Vitis vinifera L.) Cultivars
Source: MDPI journal article supplement (doi:10.3390/plants11243428), 2022-12-08
Supplement: s1 [file s1]

**Table S1.** Traits that were eliminated because they were perfectly determined by two other traits.

|                                              |                                      |
|----------------------------------------------|--------------------------------------|
| leaf petiole's length compared to leaf blade | density of the inflorescence's hairs |
| numbers of leaf blade's sinuses              | expansion of ripe bunch's peduncle   |
| density of canes internode's hairs           |                                      |

**Table S2.** Traits that were eliminated because they were perfectly determined by three other traits.

|                                                          |                      |
|----------------------------------------------------------|----------------------|
| young shoot: (15-20 cm) density of hairs                 | unripe berry: shape  |
| tendrils: color                                          | bunch : width        |
| bud of young shoot: density of hairs                     | pedicel: width       |
| mature leaf: petiole sinus base limited by veins         | berry: cross section |
| mature leaf: shape of the tip of main lobe if            | berry: size          |
| mature leaf: density of hairs on the upper side of blade | berry: patterning    |
| mature leaf : sanity                                     | berry: flesh         |
| nodes: color                                             | berry flesh: color   |
| bud: color                                               | seed: shape          |
| peduncle of unripe bunch: color                          |                      |

**Table S3.** Traits that were eliminated because they were perfectly determined by four other traits.

|                                           |                                                |
|-------------------------------------------|------------------------------------------------|
| young shoot (2-4 cm): density of hairs    | cane: bloom                                    |
| young shoot (2-4 cm): color               | cane: diameter                                 |
| tendrils: density of hairs                | cane: cross section                            |
| young shoot: color                        | bud: size                                      |
| young shoot: color of the bud             | inflorescence: color                           |
| mature leaf: shape of upper sinus         | ovary flower: size                             |
| mature leaf: shape of base of upper sinus | unripe bunch: density of the hairs on peduncle |
| mature leaf: color of petiole             | unripe bunch: patterning of peduncle           |
| mature leaf: pattern of petiole           | unripe berry: patterning density of bunch      |
| mature leaf: length of petiole            | bunch: width of peduncle                       |
| mature leaf: width                        | berry: shape                                   |
| mature leaf: size                         | berry: bloom                                   |
| mature leaf: number of lobes              | berry: taste                                   |
| mature leaf: density of hairs on teeth    | berry: brush color                             |
| mature leaf: angles between the veins     | berry: brush length                            |
| mature leaf: strength of lamina           | seed: berry size                               |
| shoots curly                              | berry: shape of seed                           |
| angle between shoot and petiole           | berry: length of stalk                         |
